# Supplementary material for: Preparation of a positively charged nanofiltration membrane based on hydrophilic–hydrophobic transformation of a poly(ionic liquid)
Source: Royal Society of Chemistry journal article supplement (doi:10.1039/c5ta01823d), 2015-01-01
Supplement: c5ta01823d1.pdf [file c5ta01823d1.pdf]

Support information for

# Preparation of Positively Charged Nanofiltration Membrane Based on Hydrophilic-hydrophobic Transformation of Poly(ionic liquid)

*Ying Tang, Beibei Tang\* and Peiyi Wu\**

State Key Laboratory of Molecular Engineering of Polymers, Collaborative  
Innovation Center of Polymers and Polymer Composite Materials, Department of  
Macromolecular Science and Laboratory of Advanced Materials, Fudan University,  
Shanghai 200433, People's Republic of China

---

\*Corresponding authors. Tel.: +86-21-65643255. Fax: +86-21-65640293.

E-mail addresses: [bbtang@fudan.edu.cn](mailto:bbtang@fudan.edu.cn) (B. Tang), or [peiyiwu@fudan.edu.cn](mailto:peiyiwu@fudan.edu.cn) (P. Wu).

## ■ SUPPORTING RESULTS:

1.

**Table S1. PWF and rejection to PEG 10000, PEG 20000 of PSf supporting membrane at 0.2 MPa**

| PSf supporting membrane | Pure water flux<br>(L/m <sup>2</sup> ·h <sup>-1</sup> ) | Rejection (%) |           |
|-------------------------|---------------------------------------------------------|---------------|-----------|
|                         |                                                         | PEG 10000     | PEG 20000 |
| Performance             | 360                                                     | 32            | 50        |

2.

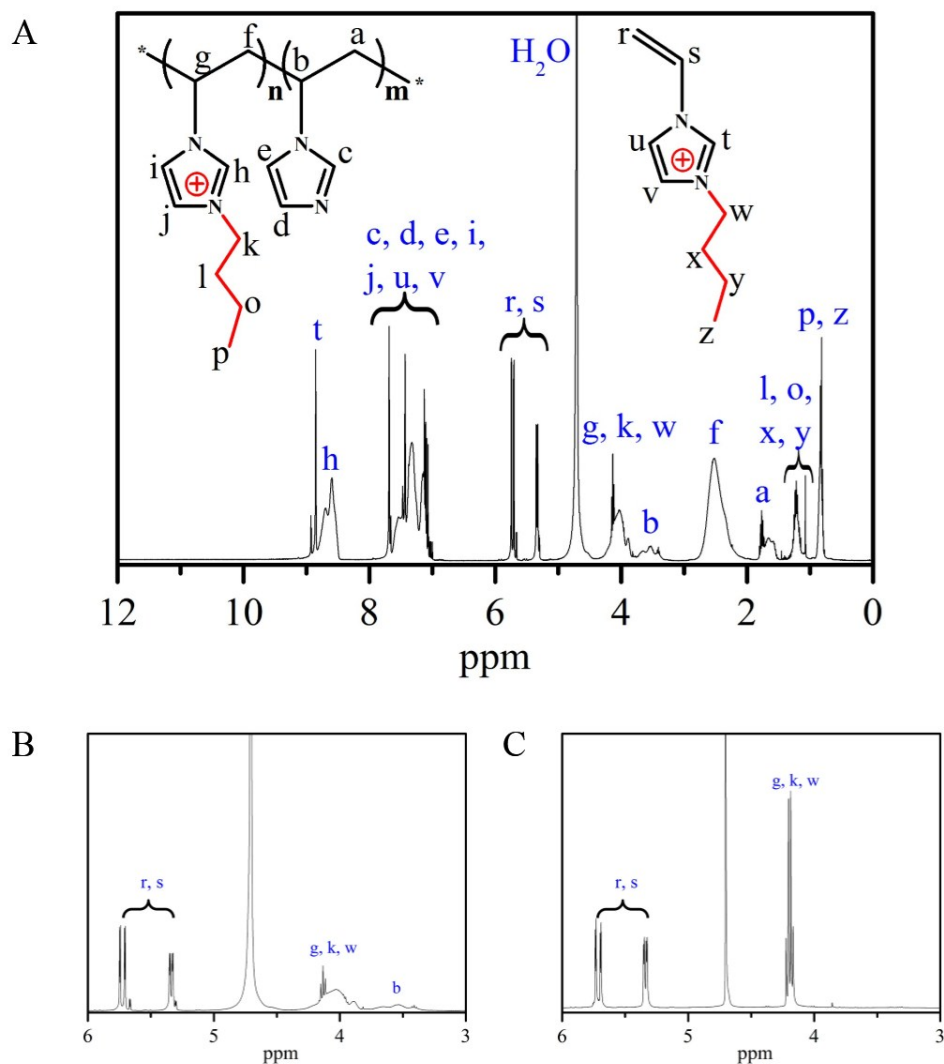

**Fig. S1** (A). <sup>1</sup>H NMR spectrum (12-0 ppm) of PIL product (prepared with VIM, BuBr and obtained by drying the original reacted aqueous without further purification), (B). Enlarged <sup>1</sup>H NMR spectrum of (A) in the range of 6 to 3 ppm, (C). <sup>1</sup>H NMR spectrum (6-3 ppm) of product of PIL homopolymer (prepared with IL monomer and obtained by drying the original reacted aqueous without further purification) in D<sub>2</sub>O at 25 °C.

**Table S2. Integrations of peaks in the spectrum of product (obtained by drying the original reacted aqueous without further purification) in D<sub>2</sub>O at 25 °C in Fig. S1 (A).**

| Peak                | Integrations |
|---------------------|--------------|
| p, z                | 1.0          |
| o, l, x, y          | 0.9          |
| a                   | 0.8          |
| f                   | 3.8          |
| b                   | 0.7          |
| g, k, w             | 1.8          |
| r, s                | 1.1          |
| c, d, e, i, j, u, v | 5.0          |
| h                   | 1.8          |
| t                   | 0.5          |

### **Illustration**

The result of <sup>1</sup>H NMR shows the quaternization reaction is well completed. The main content in hydrophilic PIL solution is hydrophilic PIL (poly (ViBuIm<sup>+</sup>Br<sup>-</sup>-co-VIM)). Furthermore, estimated from the integrations, we can analyze that nearly 85 wt% the reactants were transformed to hydrophilic PIL (poly (ViBuIm<sup>+</sup>Br<sup>-</sup>-co-VIM)). Besides, in hydrophilic PIL chains the mole ratio of ViBuIm<sup>+</sup>Br<sup>-</sup> to VIM is about 17:1 (only 5.5 mol% of VIM is unreacted with BuBr). Thus, the peaks of BuBr is not obvious in the NMR spectra.

3.

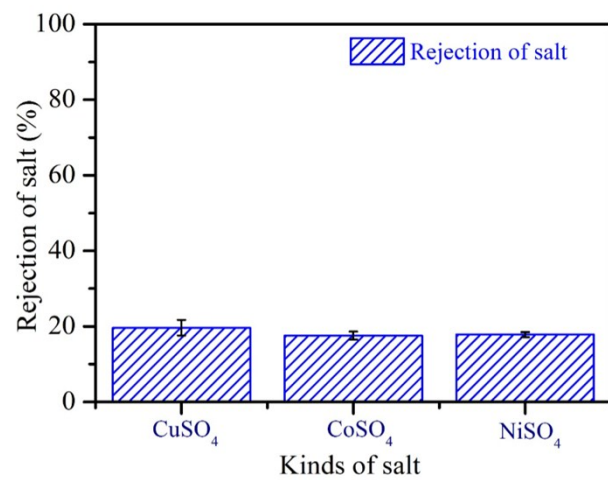

**Fig. S2** Rejection to CuSO<sub>4</sub>, CoSO<sub>4</sub> and NiSO<sub>4</sub> of PIL/PSf.

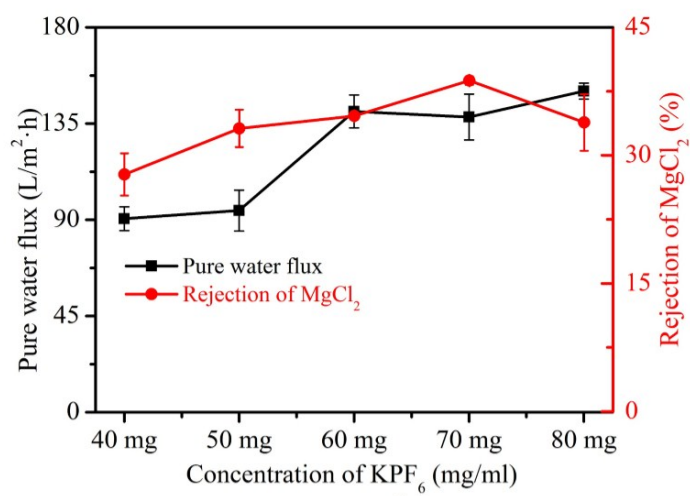

**Fig. S3** PWF and MgCl<sub>2</sub> rejection of PIL/PSf prepared from KPF<sub>6</sub> aqueous with concentration of 40, 50, 60, 70 and 80 mg/ml, when fixed the hydrophilic PIL aqueous concentration to 6 wt%.

5.

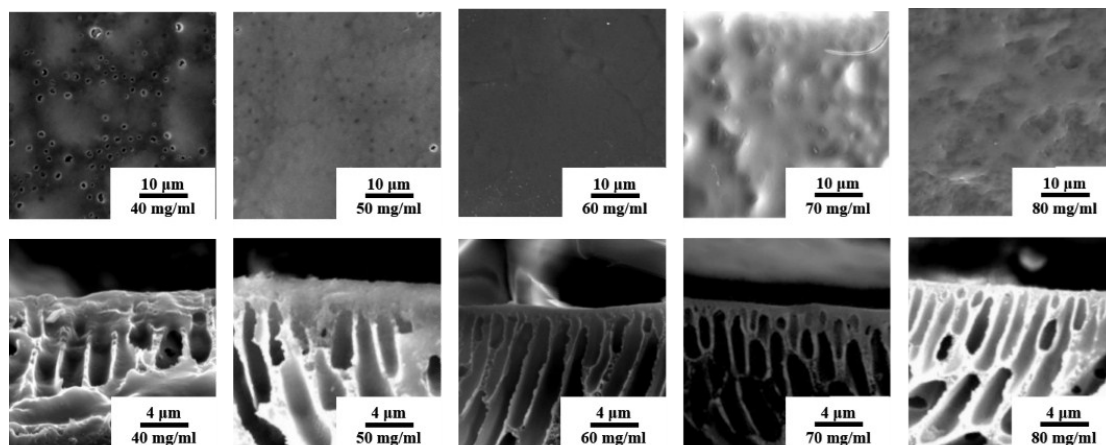

**Fig. S4** SEM images of PIL/PSf prepared from KPF<sub>6</sub> aqueous with concentration of 40, 50, 60, 70 and 80 mg/ml, when fixed the hydrophilic PIL aqueous concentration to 6 wt%.

6.

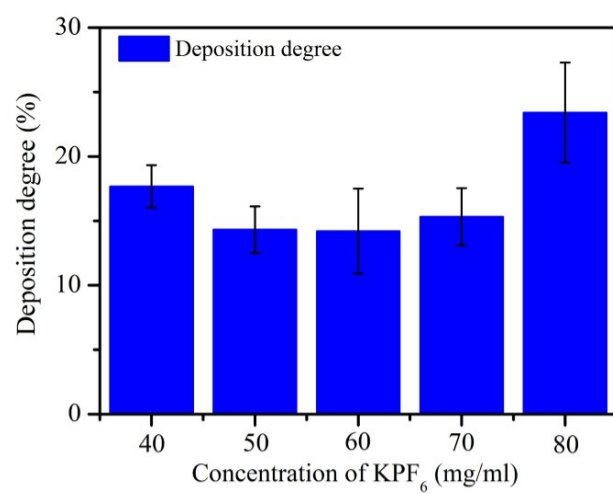

**Fig. S5** Deposition degree of PIL/PSf prepared from KPF<sub>6</sub> aqueous with concentration of 40, 50, 60, 70 and 80 mg/ml, when fixed the hydrophilic IL aqueous concentration to 6 wt%.



7.

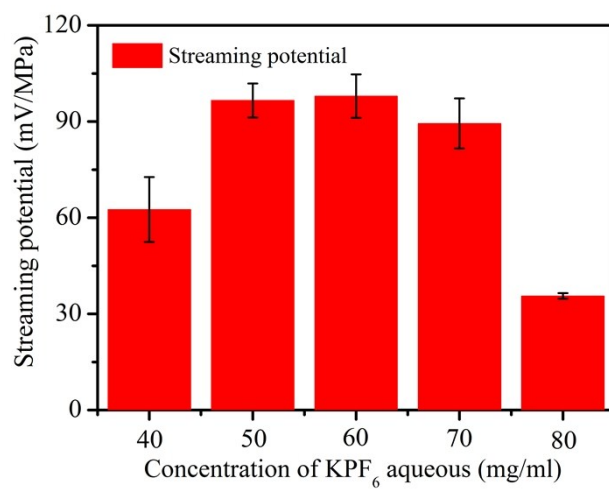

**Fig. S6** Streaming potential of PIL/PSf prepared from KPF<sub>6</sub> aqueous with concentration of 40, 50, 60, 70 and 80 mg/ml, when fixed the hydrophilic PIL aqueous concentration to 14 wt%.

8.

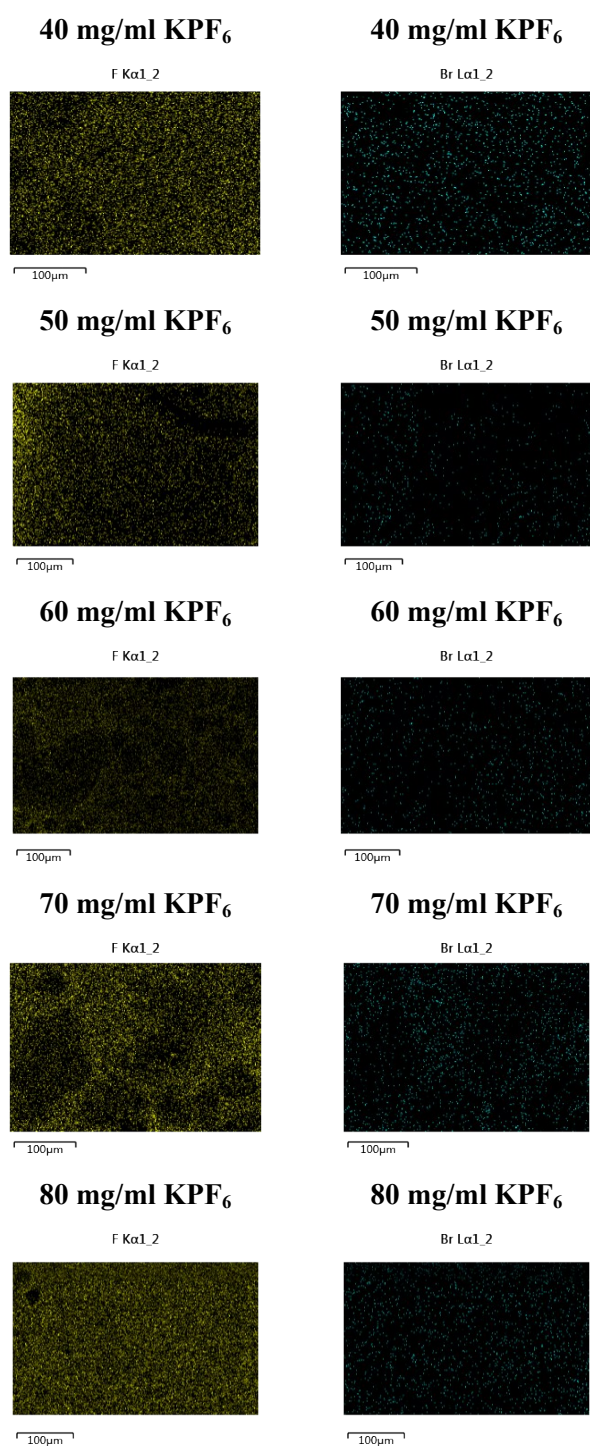

**Fig. S7** Distribution of element F and Br in the surface of PIL/PSf prepared from KPF<sub>6</sub> aqueous with concentration of 40, 50, 60, 70 and 80 mg/ml, when fixed the hydrophilic PIL aqueous concentration to 14 wt%, investigated by EDS (Oxford Instrument X-MAX 50).

**Table S3. Mole ratio of element F to Br and PF<sub>6</sub><sup>-</sup> to Br<sup>-</sup> in the surface of PIL/PSf prepared from KPF<sub>6</sub> aqueous with concentration of 40, 50, 60, 70 and 80 mg/ml, when fixed the hydrophilic PIL aqueous concentration to 14 wt%, investigated by EDS (Oxford Instrument X-MAX 50).**

| Samples  | Mole ratio of F to Br | Mole ratio of PF <sub>6</sub> <sup>-</sup> to Br <sup>-</sup> |
|----------|-----------------------|---------------------------------------------------------------|
| 40 mg/ml | 44.96                 | 7.49                                                          |
| 50 mg/ml | 58.33                 | 9.72                                                          |
| 60 mg/ml | 74.10                 | 12.35                                                         |
| 70 mg/ml | 97.99                 | 16.33                                                         |
| 80 mg/ml | 103.71                | 17.29                                                         |

9.

A

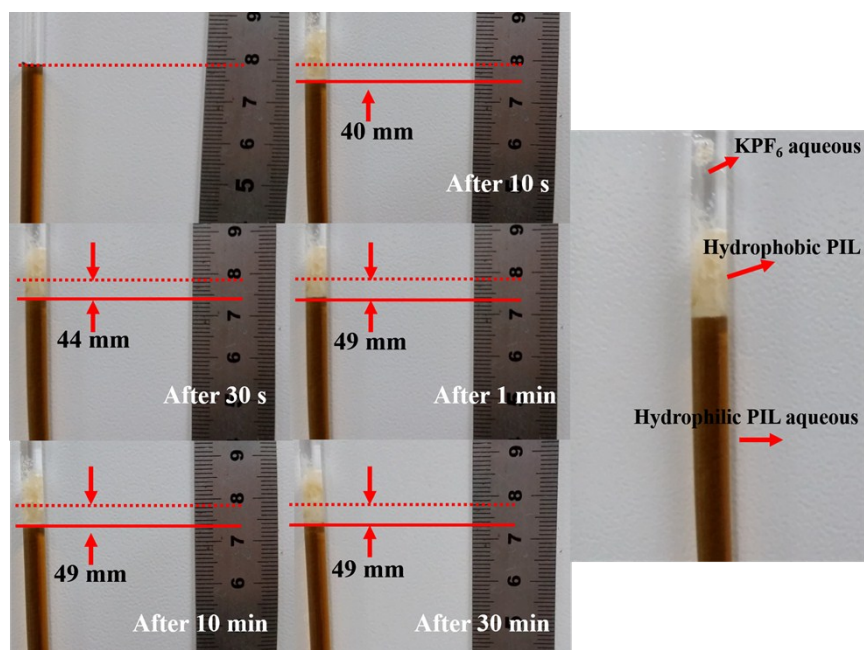

**Picture A:** The concentration of hydrophilic PIL is 14 wt% and the concentration of  $\text{KPF}_6$  is 60 mg/ml.

Picture A shows the change of the interface of hydrophilic PIL aqueous and hydrophobic PIL (white opaque layer) in tube after injecting  $\text{KPF}_6$  aqueous with different time. As a result, the interface moved quickly to the direction of hydrophilic PIL aqueous as the  $\text{PF}_6^-$  ion diffusing further into hydrophilic PIL aqueous within 1 min, which reflect the fast moving of  $\text{PF}_6^-$  into the hydrophilic PIL aqueous. After 1 min, the interface changes little.

**B**

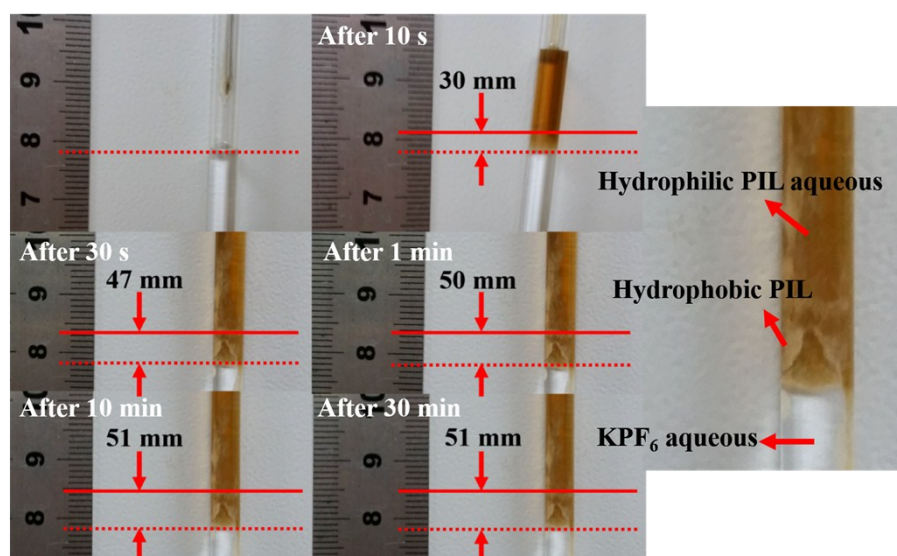

**Picture B:** The concentration of hydrophilic PIL is 14 wt% and the concentration of  $\text{KPF}_6$  is 60 mg/ml.

Picture B shows the change of the interface of hydrophilic PIL aqueous and hydrophobic PIL (white opaque layer) in tube after injecting hydrophilic PIL aqueous with different time. As a result, the interface moved quickly to the direction of hydrophilic PIL aqueous as the  $\text{PF}_6^-$  ion diffusing further into hydrophilic PIL aqueous within 1 min. After 1 min, the interface changes little. It also verifies that the moving of interface (and  $\text{PF}_6^-$ ) in Picture A is not caused by gravity.

C

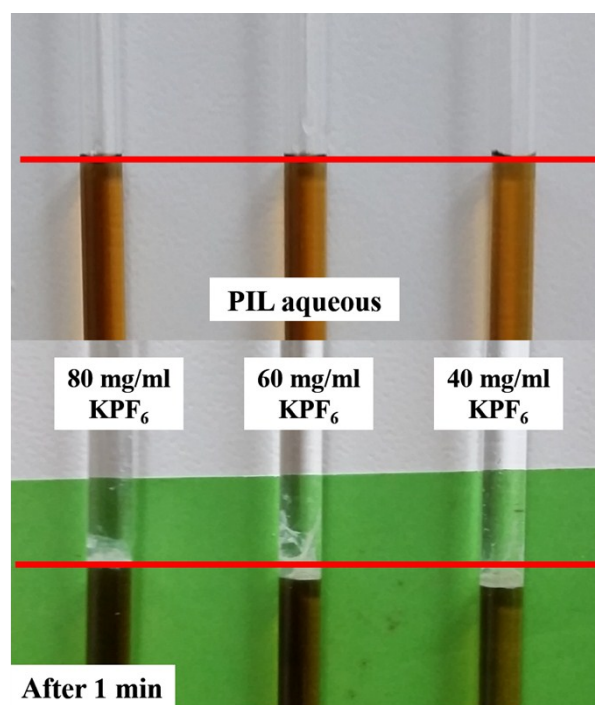

**Picture C:** The concentration of hydrophilic PIL is 14 wt% and the concentration of KPF<sub>6</sub> is 40, 60, 80 mg/ml.

Picture C shows the different change ability of the height of hydrophilic PIL aqueous in tubes after injecting KPF<sub>6</sub> aqueous with different concentration for 1 min. As expected, in the system with lower concentration of KPF<sub>6</sub> aqueous, the moving distance of PF<sub>6</sub><sup>-</sup> into the PIL aqueous is farther probably due to the looser interface formed and a less inhibiting effect.

**Fig. S8** Simulation of the hydrophobic PIL formation process in the membrane pores with small tubes.

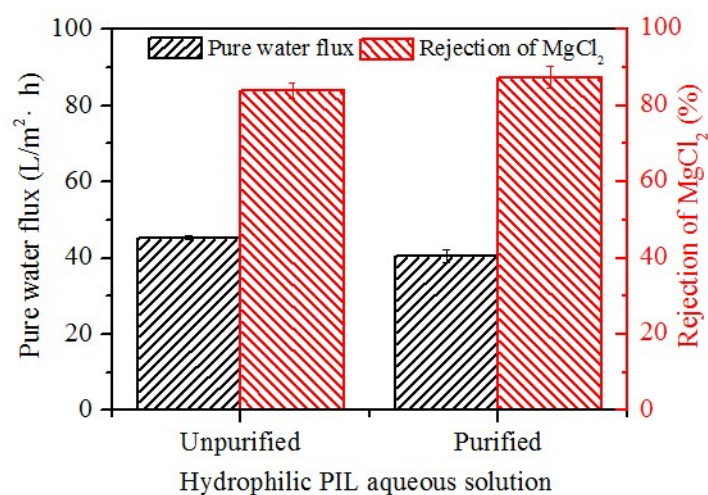

**Fig. S9** PWF and MgCl<sub>2</sub> rejection of PIL/PSf prepared from unpurified and purified hydrophilic PIL when fixed the hydrophilic PIL aqueous concentration to 14 wt% and KPF<sub>6</sub> aqueous with concentration of 60 mg/ml.
